# Supplementary material for: Molecular mechanisms of embryonic tail development in the self-fertilizing mangrove killifish Kryptolebias marmoratus
Source: Oxford University Press journal article supplement (doi:10.1242/dev.199675), 2021-12-15
Supplement: dev199675supp.pdf [file dev199675supp.pdf]

## Supplementary Materials

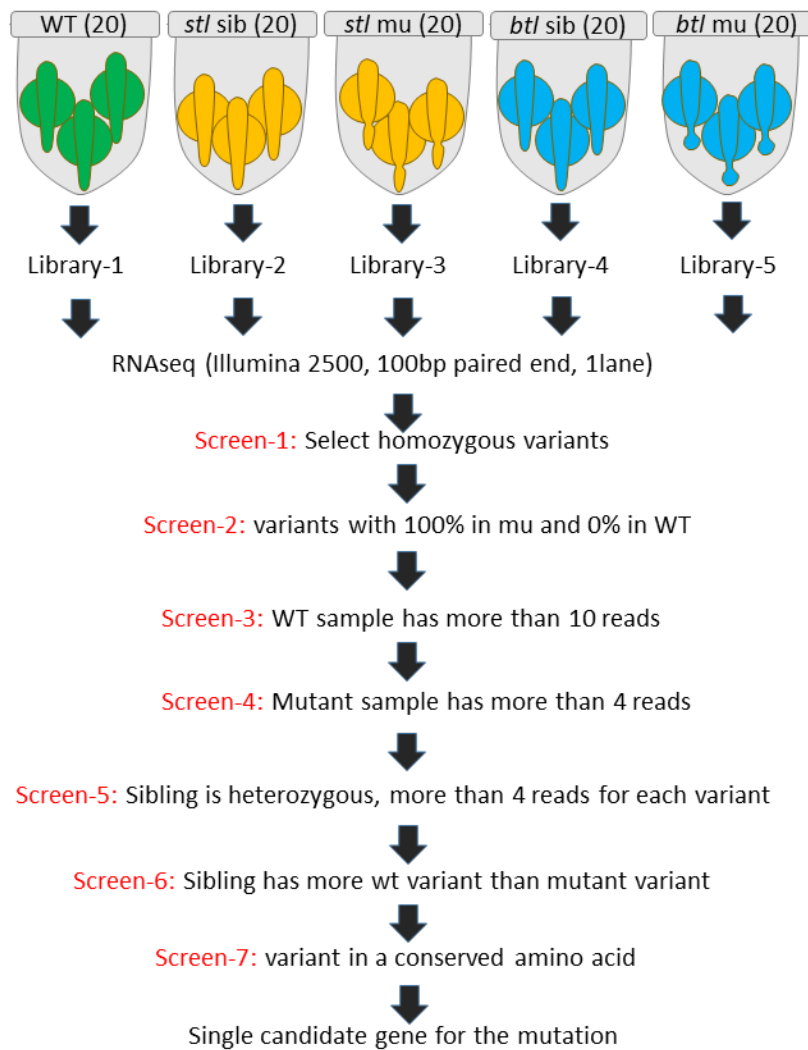

**Fig. S1. Identification of mutations from the *stl* and *btl* mutants**

Twenty embryos were pooled from WT, R109/*stl* mutants, R109/*stl* siblings, R228/*btl* mutants and R228/*btl* siblings respectively, prepared for generating differently tagged libraries and analysed by single lane of RNAseq. Identified variants were screened by different conditions (screen-1 to 7) to narrow down a single candidate mutation which is responsible for the *stl* or *btl* phenotype.

|    | R109sib<br>mean | R109<br>mean | M        | gene             | description                                                      | expression |
|----|-----------------|--------------|----------|------------------|------------------------------------------------------------------|------------|
| 1  | 351.196         | 2            | 7.456133 | emilin3a         | EMILIN-3                                                         | notochord  |
| 2  | 67.693          | 1            | 6.080935 | si:dkeyp-118a3.2 | uncharacterized protein si:dkeyp-118a3.2 isoform X1              | notochord  |
| 3  | 2890.704        | 49           | 5.882495 | cmn              | calymmin isoform X2                                              | notochord  |
| 4  | 3957.87         | 81.228       | 5.606603 | col2a1a          | collagen                                                         | notochord  |
| 5  | 165.741         | 7            | 4.565432 | loxl5b           | lysyl oxidase-like 5b isoform X1                                 | notochord  |
| 6  | 140.299         | 6.147        | 4.512478 | epha2b           | ephrin type-A receptor 2 isoform X1                              | somite     |
| 7  | 53.764          | 3.006        | 4.160724 | tcea3            | transcription elongation factor A protein 3 isoform X3           | somite     |
| 8  | 65.891          | 4.232        | 3.96067  | ncln             | nicalin-1 isoform X4                                             | cns        |
| 9  | 132.243         | 9.272        | 3.834167 | mybpc1           | myosin-binding protein C                                         | notochord  |
| 10 | 472             | 34           | 3.79518  | epyc             | epiphycan                                                        | notochord  |
| 11 | 115.077         | 8.38         | 3.779505 | calua            | calumenin-A isoform X1                                           | notochord  |
| 12 | 60.264          | 4.423        | 3.768199 | scrib            | protein scribble homolog isoform X3                              | broad      |
| 13 | 2296.985        | 172.349      | 3.736337 | col9a1b          | collagen alpha-1(IX) chain isoform X1                            | notochord  |
| 14 | 347.11          | 26.186       | 3.728525 | agnr             | agnrin isoform X4                                                | broad      |
| 15 | 48.169          | 3.658        | 3.718978 | myo18ab          | unconventional myosin-XVIIIa isoform X13                         | somite     |
| 16 | 1392.613        | 106.245      | 3.712328 | col2a1b          | collagen                                                         | notochord  |
| 17 | 133.024         | 10.515       | 3.661166 | gemin5           | gem-associated protein 5 isoform X2                              | somite     |
| 18 | 104             | 8.249        | 3.65622  | scn8aa           | sodium channel                                                   | cns        |
| 19 | 213.152         | 17           | 3.648276 | loxl1            | lysyl oxidase homolog 1                                          | notochord  |
| 20 | 82.945          | 7.015        | 3.56364  | matn3a           | matriilin-3a isoform X3                                          | notochord  |
| 21 | 82.73           | 7.104        | 3.541707 | tjp1a            | tight junction protein ZO-1 isoform X6                           | notochord  |
| 22 | 213.575         | 20.3         | 3.395191 | col4a2           | collagen alpha-2(IV) chain isoform X2                            | cns        |
| 23 | 100             | 10           | 3.321928 | egf              | pro-epidermal growth factor                                      | notochord  |
| 24 | 197.033         | 21.649       | 3.186065 | greb1            | protein GREB1 isoform X1                                         | cns        |
| 25 | 858             | 98.109       | 3.12852  | tfip11           | tuftelin-interacting protein 11 isoform X1                       | broad      |
| 26 | 61.08           | 7            | 3.125273 | angptl3          | angiopoietin-related protein 3 isoform X3                        | heart      |
| 27 | 105.886         | 12.217       | 3.11555  | sde2             | replication stress response regulator SDE2 isoform X4            | broad      |
| 28 | 127.373         | 15.247       | 3.062462 | stau1            | double-stranded RNA-binding protein Staufen homolog 1 isoform X3 | broad      |
| 29 | 123.912         | 14.983       | 3.047917 | pcdh19           | protocadherin-19 isoform X5                                      | notochord  |
| 30 | 133.037         | 16.89        | 2.977586 | otud7b           | OTU domain-containing protein 7B isoform X4                      | broad      |

**Fig. S2. Top 30 genes down-regulated in the R109/*shorttail***

From the RNAseq data, expression was estimated by mean coverage. Expression level is compared between the mutant and sibling samples. The top 30 most highly down-regulated genes which has gene expression reported in zebrafish in zfin database were selected. It is noted that 15 genes among 30 are specifically expressed in the notochord.

|    | R228asib<br>mean | R228a<br>mean | M        | gene         | description                                                 | expression         |        |
|----|------------------|---------------|----------|--------------|-------------------------------------------------------------|--------------------|--------|
| 1  | 780.44           | 21.235        | 5.199772 | col2a1b      | collagen                                                    | notochord          |        |
| 2  | 153.362          | 4.761         | 5.009533 | xirp1        | xin actin-binding repeat-containing protein 1 isoform X1    | somite             |        |
| 3  | 1371.424         | 47            | 4.86687  | thbs4b       | thrombospondin-4-B                                          | somite             |        |
| 4  | 50               | 2             | 4.643856 | LOC108243329 | mesoderm posterior protein 2-like                           | somite             |        |
| 5  | 349.154          | 18.243        | 4.258449 | igsf9b       | protein turtle homolog A isoform X2                         | somite             |        |
| 6  | 156.989          | 8.391         | 4.225677 | gata3        | transcription factor GATA-3 isoform X2                      | epidermis          |        |
| 7  | 310.484          | 17.482        | 4.150577 | pum2         | pumilio homolog 2 isoform X5                                | broad              |        |
| 8  | 201.834          | 11.765        | 4.100596 | nsd3         | histone-lysine N-methyltransferase NSD3 isoform X3          | broad              |        |
| 9  | 129.536          | 7.896         | 4.036087 | l1cama       | neural cell adhesion molecule L1.2 isoform X2               | CNS                |        |
| 10 | 90.233           | 5.924         | 3.929012 | nob1         | RNA-binding protein NOB1 isoform X3                         | broad              |        |
| 11 | 205.425          | 13.582        | 3.918844 | fgfr2        | fibroblast growth factor receptor 2 isoform X5              | broad              |        |
| 12 | 275.34           | 18.34         | 3.908149 | plxnb2b      | plexin-B2b isoform X1                                       | CNS                |        |
| 13 | 208.133          | 14            | 3.894007 | synpo2la     | synaptopodin 2-like protein                                 | somite             |        |
| 14 | 1754.864         | 118.55        | 5        | 3.887731     | LOC108241321                                                | myosin heavy chain | somite |
| 15 | 1398.197         | 96.348        | 3.859169 | col2a1a      | collagen                                                    | notochord          |        |
| 16 | 76.147           | 5.6           | 3.765288 | auts2a       | pax                                                         | broad              |        |
| 17 | 160.379          | 11.949        | 3.746523 | boc          | brother of CDO isoform X4                                   | CNS                |        |
| 18 | 89.803           | 6.767         | 3.730175 | mybpc1       | myosin-binding protein C                                    | somite             |        |
| 19 | 104.817          | 8.207         | 3.674874 | myom1b       | M-protein                                                   | cns                |        |
| 20 | 95.055           | 7.587         | 3.647161 | matn4        | matrilin-4 isoform X2                                       | notochord          |        |
| 21 | 350.971          | 28.389        | 3.627948 | map3k4       | mitogen-activated protein kinase kinase kinase 4 isoform X6 | Broad              |        |
| 22 | 195              | 16            | 3.60733  | myog         | myogenin                                                    | Somite             |        |
| 23 | 60.256           | 4.963         | 3.601821 | qki2         | protein quaking-B isoform X1                                | Broad              |        |
| 24 | 57.411           | 4.737         | 3.599282 | myo18ab      | unconventional myosin-XVIIIa isoform X13                    | somite             |        |
| 25 | 330              | 27.364        | 3.592115 | tsc1a        | TSC complex subunit 1a isoform X1                           | somite             |        |
| 26 | 72.08            | 6.005         | 3.585363 | foxp2        | forkhead box protein P2 isoform X2                          | cns                |        |
| 27 | 104.596          | 9.033         | 3.533479 | bcam         | basal cell adhesion molecule isoform X4                     | notochord          |        |
| 28 | 138.465          | 11.963        | 3.53287  | pax7a        | paired box protein Pax-7a isoform X1                        | somite             |        |
| 29 | 87               | 8             | 3.442943 | LOC108242670 | solute carrier family 2                                     | broad              |        |
| 30 | 143.649          | 13.328        | 3.430016 | scrib        | protein scribble homolog isoform X16                        | broad              |        |

**Fig. S3. Top 30 genes down-regulated in the R228/*balltail***

From the RNAseq data, expression was estimated by mean coverage. Expression level is compared between the mutant and sibling samples. The top 30 most highly down-regulated genes which has gene expression reported in zebrafish in zfin database were selected. It is noted that 11 genes among 30 are specifically expressed in the somite muscle.
